# Supplementary material for: Breaking the activity and stability bottlenecks for acid hydrogen evolution by strong metal–support interaction between Pt nanoparticles and amorphous MoOx
Source: Royal Society of Chemistry journal article supplement (doi:10.1039/d4cy00114a), 2024-01-01
Supplement: d4cy00114a1.pdf [file d4cy00114a1.pdf]

Supplementary Information for

**Breaking the Activity and Stability Bottlenecks for Acid Hydrogen Evolution by Strong Metal-Support Interaction between Pt Nanoparticles and Amorphous MoO<sub>x</sub>**

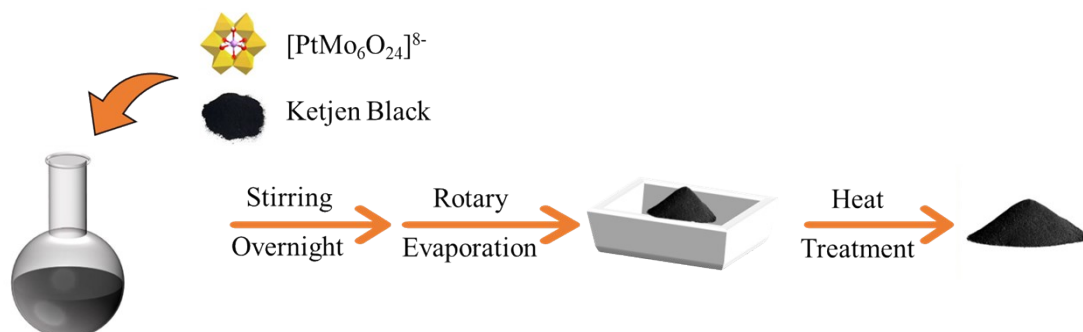

Figure S1. Schematic illustration of the synthetic route of a series of electrocatalysts

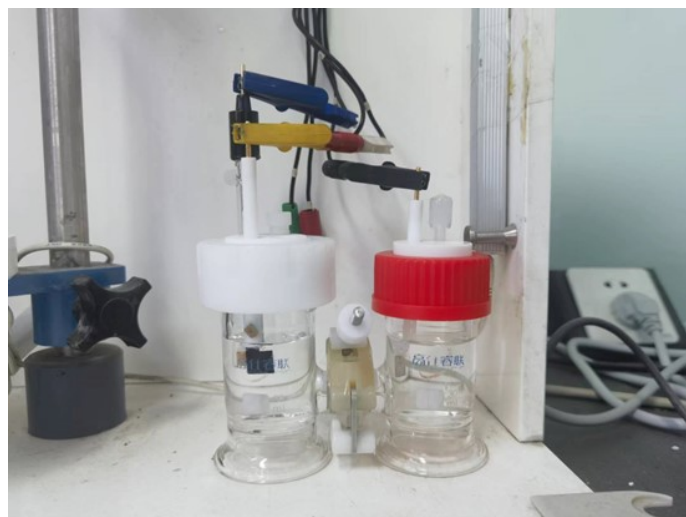

Figure S2. The image of a H-type electrolytic cells used for HER stability test.

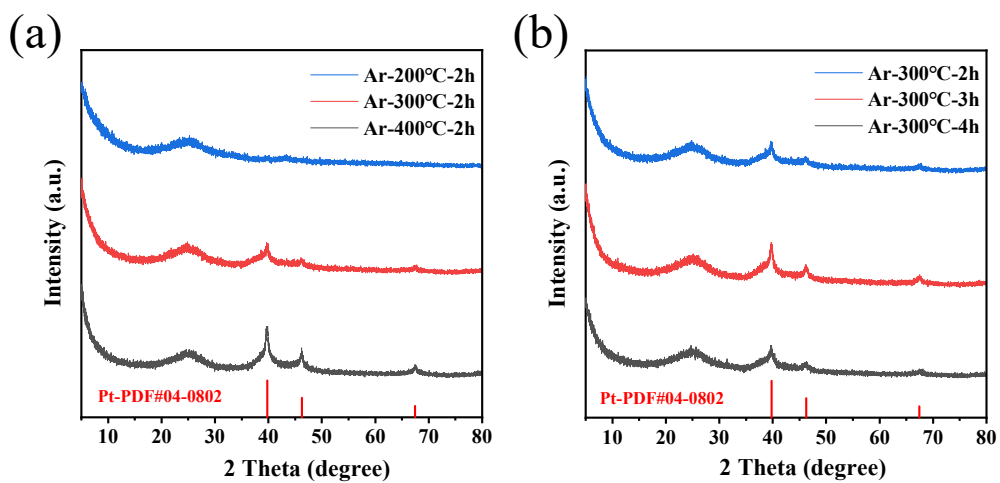

Figure S3. XRD patterns of Pt-MoO<sub>x</sub>/C in (a) different treatment temperature, (b) different treatment time.

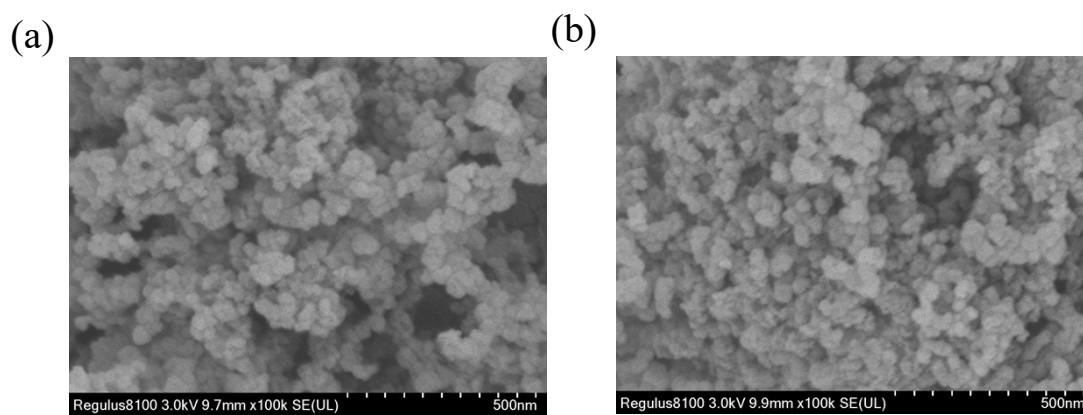

Figure S4. SEM images of (a) Pt-MoO<sub>x</sub>/C and (b) Ketjen Black.

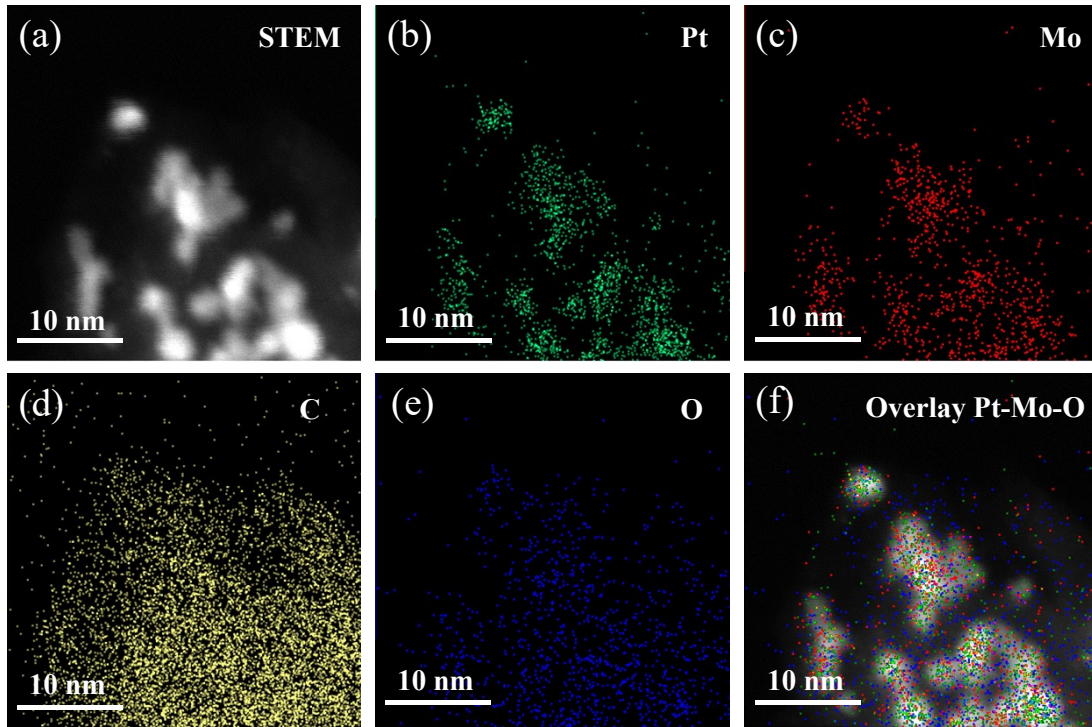

Figure S5. STEM and EDS mapping images of Pt-MoO<sub>x</sub>/C.

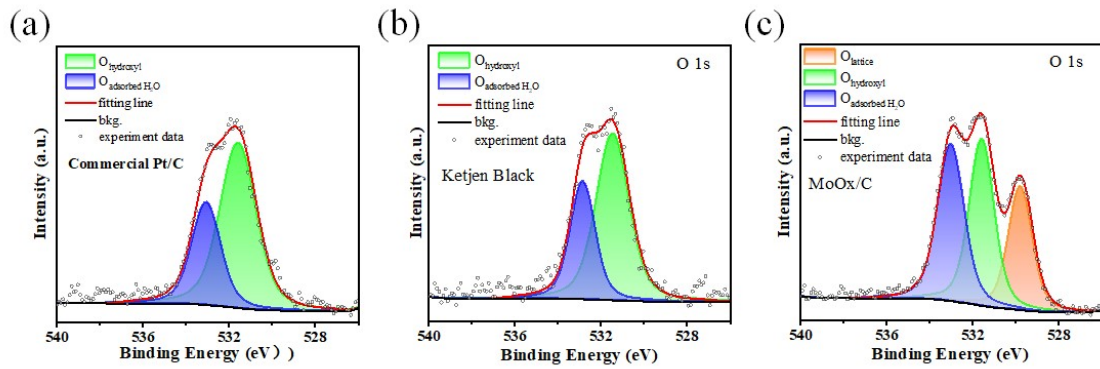

Figure S6. The O 1s XPS spectrum of (a) Commercial Pt/C, (b) Ketjen Black, (c) MoO<sub>x</sub>/C.

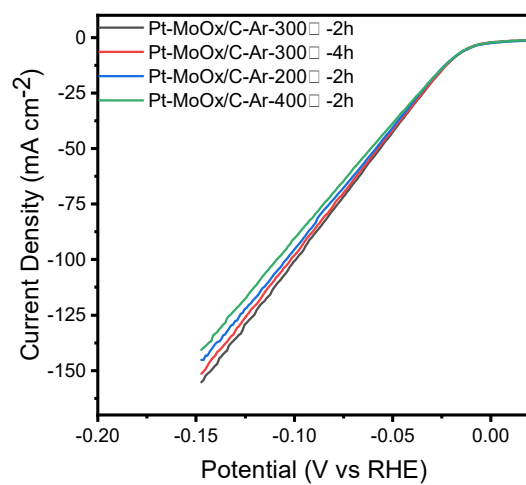

Figure S7. The LSV curves of Pt-MoO<sub>x</sub>/C synthesized at different treatment conditions.

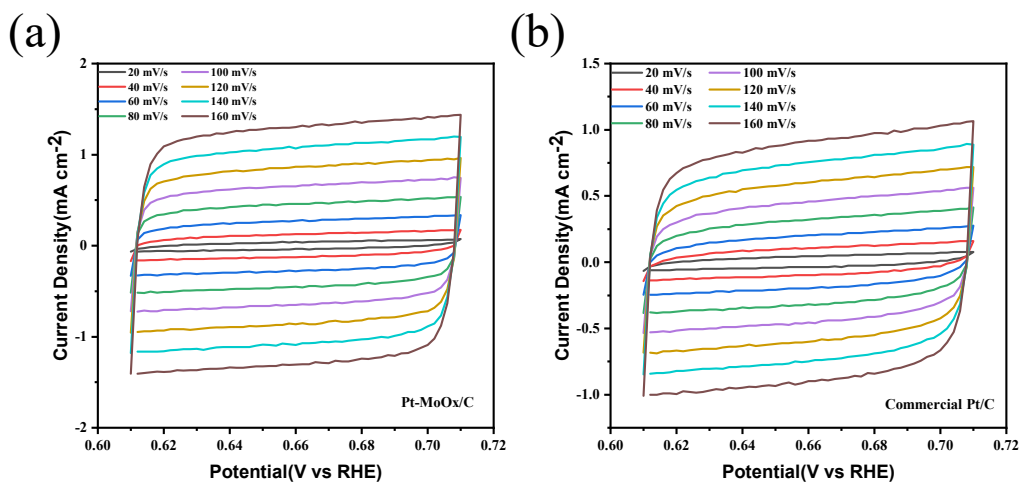

Figure S8. CV scans of Pt-MoO<sub>x</sub>/C and commercial 20% Pt/C.

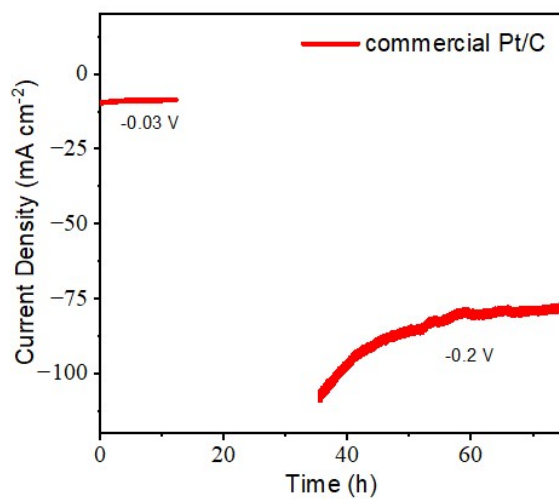

Figure S9. The chronoamperometric test of commercial Pt/C.

Table S1. Comparison of the HER performance of the reported catalysts.

| Catalysts                                      | Electrolyte                          | Overpotential (mV) |              | Tafel slope<br>mV dec <sup>-1</sup> | Stability    | Ref.      |
|------------------------------------------------|--------------------------------------|--------------------|--------------|-------------------------------------|--------------|-----------|
|                                                |                                      | $\eta_{10}$        | $\eta_{100}$ |                                     |              |           |
| Pt-MoO <sub>x</sub> /C                         | 0.5 M H <sub>2</sub> SO <sub>4</sub> | 4                  | 29           | 31.7                                | 100h         | This work |
| Ptdoped@WC <sub>x</sub>                        | 0.5 M H <sub>2</sub> SO <sub>4</sub> | 2                  |              | 20                                  | 12h          | 1         |
| Pt-SA/ $\alpha$ -MoO <sub>x</sub>              | 0.5 M H <sub>2</sub> SO <sub>4</sub> | 19                 |              | 123                                 | 20h          | 2         |
| Pt/WO <sub>3</sub>                             | 0.5 M H <sub>2</sub> SO <sub>4</sub> | 8                  | 26           | 35                                  | 65h          | 3         |
| Pt@VNC                                         | 0.5 M H <sub>2</sub> SO <sub>4</sub> | 5                  |              | 21                                  | 40h          | 4         |
| 3D Pt <sub>1</sub> Mo <sub>1-x</sub> @graphene | 0.5 M H <sub>2</sub> SO <sub>4</sub> | 32                 |              | 32                                  | 5000 cycles  | 5         |
| Pt <sub>4</sub> /Co                            | 0.5 M H <sub>2</sub> SO <sub>4</sub> | 6.8                |              | 40.99                               | 22h          | 6         |
| Pt/TiO <sub>2</sub> -O <sub>v</sub>            | 0.5 M H <sub>2</sub> SO <sub>4</sub> | 18                 |              | 12                                  | 20h          | 7         |
| Pt/def-WO <sub>3</sub> @CFC                    | 0.5 M H <sub>2</sub> SO <sub>4</sub> | 42                 |              | 73                                  | 10000 cycles | 8         |
| PtNC/S-C                                       | 0.5 M H <sub>2</sub> SO <sub>4</sub> | 11                 |              | 23.5                                | 10000 cycles | 9         |
| PtW@WO <sub>3</sub>                            | 0.5 M H <sub>2</sub> SO <sub>4</sub> | 19.4               |              | 27.8                                | 2 h          | 10        |
| K <sub>2</sub> PtCl <sub>4</sub> @NC-M         | 0.5 M H <sub>2</sub> SO <sub>4</sub> | 11                 |              | 21                                  | 40h          | 11        |

Table S2. Pt and Mo contents in Pt-MoO<sub>x</sub>/C measured by ICP-OES

| Element       | Pt  | Mo  |
|---------------|-----|-----|
| Content (wt%) | 8.1 | 4.7 |

## References

1. Ma T, Cao H, Li S, Cao S, Zhao Z, Wu Z, et al. Crystalline Lattice-Confined Atomic Pt in Metal Carbides to Match Electronic Structures and Hydrogen Evolution Behaviors of Platinum. *Adv. Mater.* 2022;**34**(41):2206368.
2. Xu J. Amorphous MoO<sub>x</sub>-Stabilized Single Platinum Atoms with Ultrahigh Mass Activity for Acidic Hydrogen Evolution. *Nano Energy.* 2020;**70**:104529.
3. Fan X, Liu C, Gao B, Li H, Zhang Y, Zhang H, et al. Electronic Structure Engineering of Pt Species over Pt/WO<sub>3</sub> toward Highly Efficient Electrocatalytic Hydrogen Evolution. *Small.* 2023;**19**(32):2301178.
4. Jin H, Ha M, Kim MG, Lee JH, Kim KS. Engineering Pt Coordination Environment with Atomically Dispersed Transition Metal Sites Toward Superior Hydrogen Evolution. *Adv. Energy Mater.* 2023;**13**(11):2204213.
5. Nguyen VT, Nguyen NA, Ali Y, Tran QC, Choi HS. Graphene Dot Armored PtMo Nanosponge as a Highly Efficient and Stable Electrocatalyst for Hydrogen Evolution Reactions in both Acidic and Alkaline Media. *Carbon.* 2019;**146**:116–24.

6. Sun L, Li Q, Zhang S, Xu D, Xue Z, Su H, et al. Heterojunction-Based Electron Donators to Stabilize and Activate Ultrafine Pt Nanoparticles for Efficient Hydrogen Atom Dissociation and Gas Evolution. *Angew. Chem. Int. Ed.* 2021;**60**(49):25766–70.
7. Wu Z, Yang P, Li Q, Xiao W, Li Z, Xu G, et al. Microwave Synthesis of Pt Clusters on Black TiO<sub>2</sub> with Abundant Oxygen Vacancies for Efficient Acidic Electrocatalytic Hydrogen Evolution. *Angew. Chem. Int. Ed.* 2023;**62**(14):e202300406.
8. Tian H, Cui X, Zeng L, Su L, Song Y, Shi J. Oxygen Vacancy-assisted Hydrogen Evolution Reaction of the Pt/WO<sub>3</sub> Electrocatalyst. *J. Mater. Chem. A.* 2019;**7**(11):6285–93.
9. Yan QQ, Wu DX, Chu SQ, Chen ZQ, Lin Y, Chen MX, et al. Reversing the Charge Transfer between Platinum and Sulfur-doped Carbon Support for Electrocatalytic Hydrogen Evolution. *Nat. Commun.* 2019;**10**(1):4977.
10. Kobayashi D, Kobayashi H, Wu D, Okazoe S, Kusada K, Yamamoto T, et al. Significant Enhancement of Hydrogen Evolution Reaction Activity by Negatively Charged Pt through Light Doping of W. *J. Am. Chem. Soc.* 2020;**142**(41):17250–4.
11. Jin H, Sultan S, Ha M, Tiwari JN, Kim MG, Kim KS. Simple and Scalable Mechanochemical Synthesis of Noble Metal Catalysts with Single Atoms toward Highly Efficient Hydrogen Evolution. *Adv. Funct. Mater.* 2020;**30**(25):2000531.
